# Supplementary material for: Chronic liver disease not a significant comorbid condition for COVID-19
Source: PubMed Central journal article supplement (PMC8175434; doi:10.1038/s41598-021-91238-8), 2021-06-03
Supplement: 41598_2021_91238_MOESM1_ESM.pdf [file 41598_2021_91238_MOESM1_ESM.pdf]

## Chronic liver disease not a significant comorbid condition for COVID-19

Jiahao Lin<sup>1+</sup>, M.D.; Bingting Bao<sup>4+</sup>, M.S.; Nigar Anjuman Khurram<sup>5</sup>, M.D.;  
Kasey Halsey<sup>2,3</sup>, B.A.; Ji Whae Choi<sup>2,3</sup>, B.A.; Lesan Wang<sup>8</sup>, MD. PhD.; Thi My  
Linh Tran<sup>2,3</sup>, B.S.; Wei-Hua Liao<sup>6</sup>, M.D.; Michael D. Feldman<sup>7</sup>, MD. PhD.; Paul  
J. Zhang<sup>7</sup>, M.D.; Jing Wu<sup>1\*</sup>, M.D; Harrison X. Bai<sup>2,3\*</sup>, M.D..

1. Department of Radiology, Second Xiangya Hospital, Central South University, Changsha, Hunan 410011,  
China
2. Department of Diagnostic Imaging, Rhode Island Hospital, Philadelphia, PA 19104, USA
3. Warren Alpert Medical School, Brown University, Rhode Island Hospital, Providence, RI 02903, USA
4. Xiangya Medical School, Central South University, Changsha, Hunan 410013, China
5. Department of Pathology, University of California, San Francisco 91413, USA
6. Department of Radiology, Xiangya Hospital, Central South University, Changsha, Hunan 410008, China
7. Department of Pathology, University of Pennsylvania, Philadelphia, PA 19104, USA
8. Department of Epidemiology and Health Statistics, Xiangya School of Public Health, Central South University,  
Changsha, Hunan 410008, China

\*corresponding author: wujingkiki622@gmail.com, Harrison X. Bai: harrison\_bai@brown.edu

+These authors contributed equally to this study.

## Supplementary

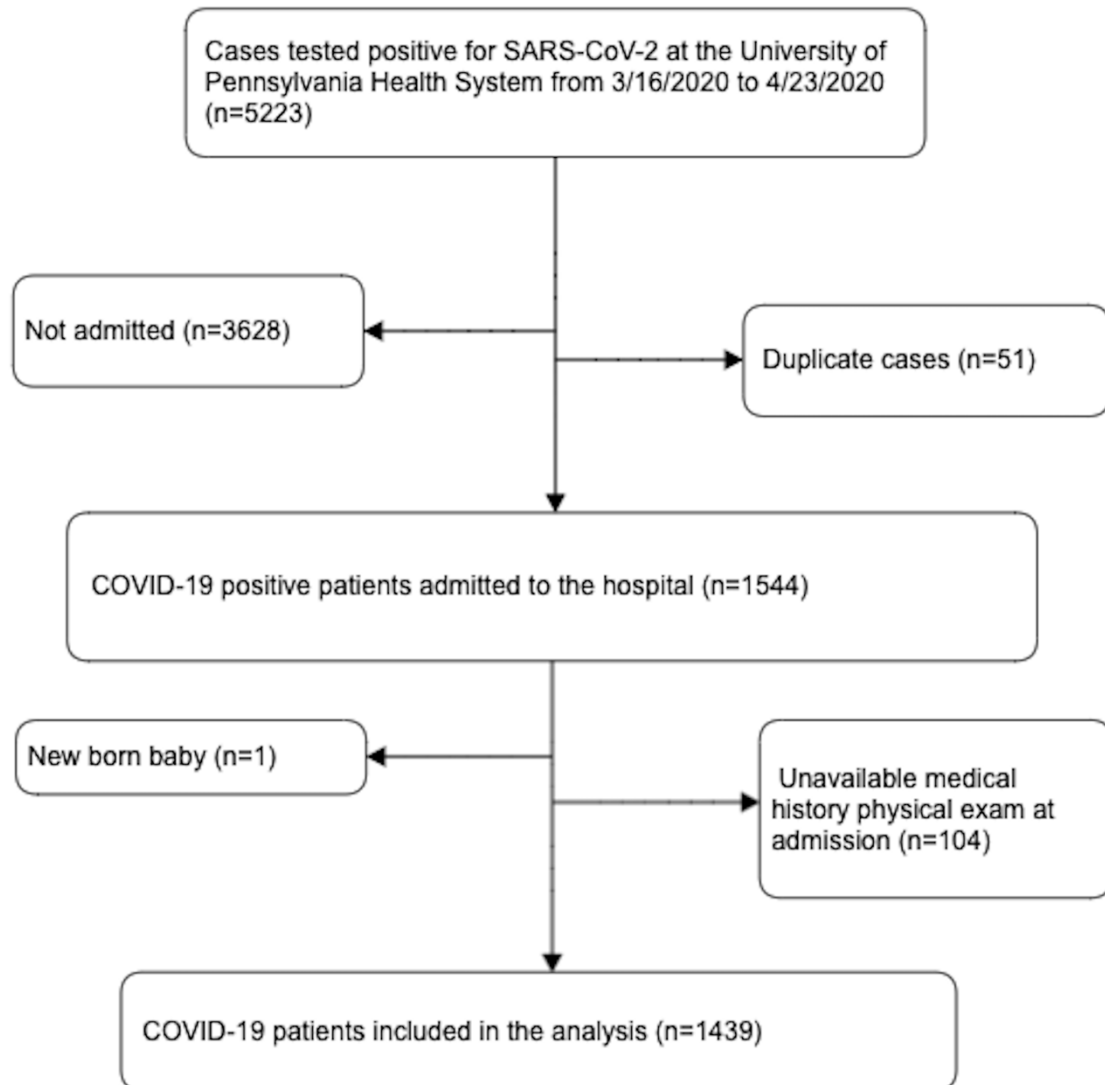

Supplementary Fig. S1. Flow chart of patient inclusion and exclusion

Supplementary Table S1. Clinical information of 47 COVID-19 patients with chronic liver disease

| Patients | Age (years) | Gender | Diagnosis                                          | Time (months) | HCVAb/HBcAb | AKP               | Albumin            | AST/ALT           | Histopathology                                                                   | Image modality | Image finding |           |              | Disease stage |
|----------|-------------|--------|----------------------------------------------------|---------------|-------------|-------------------|--------------------|-------------------|----------------------------------------------------------------------------------|----------------|---------------|-----------|--------------|---------------|
|          |             |        |                                                    |               |             | before COVID(U/L) | before COVID(g/dL) | before COVID(U/L) |                                                                                  |                | Cirrhosis     | Steatosis | Hepatomegaly |               |
| 1        | 81          | Male   | Chronic hepatitis C                                | 22            | reactive    | 59                | 3.5                | 38/37             | na                                                                               | na             | na            | na        | na           | 1-Hepatitis   |
| 2        | 79          | Female | Chronic hepatitis C                                | 18            | reactive    | 60                | 3                  | 16/18             | na                                                                               | CT             | no            | no        | no           | 1-Hepatitis   |
| 3        | 66          | Male   | Chronic hepatitis B                                | 16            | reactive    | 44                | 4.3                | 33/14             | na                                                                               | na             | na            | na        | na           | 1-Hepatitis   |
| 4        | 60          | Female | Chronic hepatitis C                                | 13            | reactive    | 37                | 2.2                | 45/29             | na                                                                               | US             | no            | yes       | yes          | 1-Hepatitis   |
| 5        | 48          | Male   | Non-alcoholic steatohepatitis, Chronic hepatitis C | 10            | reactive    | 83                | 4.6                | 18/33             | na                                                                               | US             | no            | yes       | no           | 1-Steatosis   |
| 6        | 79          | Male   | Chronic hepatitis C, Fibrosis of liver             | 82            | reactive    | 112               | 4                  | 15/11             | Chronic hepatitis, consistent with hepatitis C virus infection, Grade 2, Stage 2 | US             | yes           | no        | no           | 3-Cirrhosis   |
| 7        | 35          | Male   | Chronic hepatitis C                                | 8             | reactive    | 115               | 4.1                | 57/111            | na                                                                               | na             | na            | na        | na           | 1-Hepatitis   |
| 8        | 27          | Male   | Chronic hepatitis B                                | 81            | reactive    | 61                | 4.3                | 18/15             | na                                                                               | na             | na            | na        | na           | 1-Hepatitis   |

|    |    |        |                                               |     |          |     |     |       |    |    |     |     |     |                            |
|----|----|--------|-----------------------------------------------|-----|----------|-----|-----|-------|----|----|-----|-----|-----|----------------------------|
| 9  | 32 | Male   | Chronic hepatitis B                           | 7   | reactive | 50  | 4.3 | 66/58 | na | na | na  | na  | na  | 1-Hepatitis                |
| 10 | 61 | Male   | Chronic hepatitis C, Hepatocellular carcinoma | 62  | reactive | 88  | 4.5 | 17/13 | na | MR | yes | no  | no  | 4-Hepatocellular carcinoma |
| 11 | 67 | Male   | Chronic hepatitis C                           | 44  | reactive | 128 | 3.7 | 14/10 | na | na | na  | na  | na  | 1-Hepatitis                |
| 12 | 59 | Female | Chronic hepatitis C                           | 70  | reactive | 145 | 4   | 17/18 | na | na | na  | na  | na  | 1-Hepatitis                |
| 13 | 70 | Male   | Chronic hepatitis B, cirrhosis                | 78  | reactive | 49  | 4   | 30/30 | na | US | yes | yes | no  | 3-Cirrhosis                |
| 14 | 25 | Female | Chronic hepatitis C, cirrhosis                | 31  | reactive | 83  | 2.4 | 23/10 | na | US | yes | yes | yes | 3-Cirrhosis                |
| 15 | 65 | Male   | Fatty liver                                   | 39  | na       | 74  | 4.1 | 25/28 | na | US | no  | yes | yes | 1-Steatosis                |
| 16 | 84 | Female | Fatty liver                                   | 104 | na       | 55  | 3   | 14/14 | na | na | na  | na  | na  | 1-Steatosis                |
| 17 | 62 | Female | Alcoholic cirrhosis                           | 86  | na       | 204 | 2.9 | 68/20 | na | CT | no  | yes | no  | 3-Cirrhosis                |
| 18 | 69 | Male   | Chronic hepatitis C, cirrhosis                | 37  | reactive | 60  | 4.7 | 26/25 | na | na | na  | na  | na  | 3-Cirrhosis                |
| 19 | 58 | Male   | Chronic hepatitis C, cirrhosis                | 43  | reactive | 53  | 3.7 | 19/17 | na | US | yes | no  | yes | 3-Cirrhosis                |
| 20 | 62 | Male   | Chronic hepatitis B                           | 8   | reactive | 46  | 3.5 | 65/37 | na | na | na  | na  | na  | 1-Hepatitis                |

|    |    |        |                                                          |     |          |    |     |       |    |    |     |     |     |                            |
|----|----|--------|----------------------------------------------------------|-----|----------|----|-----|-------|----|----|-----|-----|-----|----------------------------|
| 21 | 77 | Female | Chronic hepatitis C, cirrhosis                           | 15  | reactive | 69 | 2.6 | 9/5   | na | na | na  | na  | na  | 3-Cirrhosis                |
| 22 | 62 | Male   | Chronic hepatitis C                                      | 94  | reactive | 79 | 3.3 | 15/9  | na | na | na  | na  | na  | 1-Hepatitis                |
| 23 | 69 | Female | Chronic hepatitis C                                      | 32  | reactive | 74 | 3.6 | 17/13 | na | na | na  | na  | na  | 1-Hepatitis                |
| 24 | 72 | Male   | Chronic hepatitis C, cirrhosis, hepatocellular carcinoma | 68  | reactive | 65 | 4.4 | 24/18 | na | MR | yes | yes | yes | 4-Hepatocellular carcinoma |
| 25 | 62 | Male   | Chronic hepatitis C, cirrhosis                           | 91  | reactive | 66 | 3.8 | 12/9  | na | US | yes | yes | no  | 3-Cirrhosis                |
| 26 | 59 | Male   | Chronic hepatitis C                                      | 156 | reactive | 49 | 3.9 | 18/14 | na | na | na  | na  | na  | 1-Hepatitis                |
| 27 | 42 | Male   | Chronic hepatitis B, cirrhosis                           | 17  | reactive | 71 | 4.3 | 23/11 | na | US | yes | no  | no  | 3-Cirrhosis                |
| 28 | 74 | Male   | Chronic hepatitis C                                      | 48  | reactive | 62 | 3.3 | 18/15 | na | na | na  | na  | na  | 1-Hepatitis                |
| 29 | 68 | Female | Alcoholic cirrhosis                                      | 22  | na       | 53 | 3.9 | 15/13 | na | CT | no  | no  | no  | 3-Cirrhosis                |
| 30 | 72 | Female | Chronic hepatitis B                                      | 88  | reactive | 79 | 2.6 | 24/17 | na | na | na  | na  | na  | 1-Hepatitis                |
| 31 | 43 | Male   | Other specified disorders of liver                       | 149 | na       | 68 | 4.7 | 16/17 | na | na | na  | na  | na  | 1-Hepatitis                |

|    |    |        |                     |     |          |     |     |       |                                                |    |     |     |     |                  |
|----|----|--------|---------------------|-----|----------|-----|-----|-------|------------------------------------------------|----|-----|-----|-----|------------------|
| 32 | 60 | Female | Hepatic steatosis   | 132 | na       | 59  | 4.2 | 38/27 | na                                             | US | no  | yes | yes | 1-Hepatosteatosi |
| 33 | 35 | Female | Chronic hepatitis B | 113 | reactive | 53  | 3.1 | 16/13 | na                                             | na | na  | na  | na  | 1-Hepatitis      |
| 34 | 54 | Male   | Hepatic steatosis   | 10  | na       | 47  | 4.5 | 68/58 | na                                             | CT | no  | yes | no  | 1-Hepatosteatosi |
| 35 | 75 | Female | Chronic hepatitis C | 55  | reactive | 64  | 3.2 | 9/3   | na                                             | na | na  | na  | na  | 1-Hepatitis      |
| 36 | 52 | Female | Alcoholic cirrhosis | 89  | na       | 78  | 3.9 | 14/7  | na                                             | na | na  | na  | na  | 3-Cirrhosis      |
| 37 | 41 | Male   | Chronic hepatitis B | 49  | reactive | 39  | 4.4 | 16/21 | na                                             | US | no  | yes | no  | 1-Hepatitis      |
| 38 | 75 | Female | Hepatic steatosis   | 100 | na       | 417 | 3.4 | 84/93 | na                                             | US | no  | no  | yes | 1-Hepatosteatosi |
| 39 | 36 | Female | Hepatic steatosis   | 7   | na       | 108 | 3.1 | 16/23 | na                                             | CT | no  | yes | no  | 1-Hepatosteatosi |
| 40 | 66 | Male   | Chronic hepatitis C | 80  | reactive | 116 | 1.3 | 18/11 | na                                             | na | na  | na  | na  | 1-Hepatitis      |
| 41 | 58 | Male   | Chronic hepatitis C | 124 | reactive | na  | na  | na    | na                                             | na | na  | na  | na  | 1-Hepatitis      |
| 42 | 57 | Male   | Chronic hepatitis C | 86  | reactive | 63  | 4.2 | 52/47 | na                                             | na | na  | na  | na  | 1-Hepatitis      |
| 43 | 68 | Female | Alcoholic cirrhosis | 22  | na       | 53  | 3.9 | 15/13 | na                                             | CT | no  | no  | no  | 3-Cirrhosis      |
| 44 | 55 | Male   | Alcoholic cirrhosis | 40  | na       | 111 | 4.2 | 57/61 | na                                             | US | yes | no  | no  | 3-Cirrhosis      |
| 45 | 58 | Male   | Chronic hepatitis C | 191 | reactive | 38  | 2.7 | 22/14 | Chronic hepatitis, grade 1 of 4, stage 1 of 4. | US | yes | no  | no  | 3-Cirrhosis      |
| 46 | 70 | Male   | Chronic hepatitis C | 189 | reactive | 50  | 4.4 | 13/11 | na                                             | US | yes | no  | no  | 3-Cirrhosis      |

|    |    |        |                                      |    |          |     |     |       |    |    |    |    |    |             |
|----|----|--------|--------------------------------------|----|----------|-----|-----|-------|----|----|----|----|----|-------------|
| 47 | 67 | Female | Chronic<br>hepatitis B,<br>cirrhosis | 17 | reactive | 301 | 2.9 | 41/27 | na | CT | no | no | no | 3-Cirrhosis |
|----|----|--------|--------------------------------------|----|----------|-----|-----|-------|----|----|----|----|----|-------------|

---

Abbreviations: AKP, alkaline phosphatase; ALT, alanine aminotransferase; AST, aspartate aminotransferase.

Supplementary Table S2. Clinical characteristics of COVID-19 patients with CLD stratified into critical or non-critical groups

| Clinical and laboratory        | Total (n=47) | Non-critical (n=30) | Critical† (n=17) | P value |
|--------------------------------|--------------|---------------------|------------------|---------|
| Age, mean±SD, years            | 55.2±19.9    | 57.9±13.8           | 62.0±15.3        | 0.356   |
| Sex                            |              |                     |                  |         |
| Male                           | 31 (66.0)    | 18 (60.0)           | 13 (76.5)        | 0.252   |
| Female                         | 16 (34.0)    | 12 (40.0)           | 4 (23.5)         |         |
| Comorbidities                  |              |                     |                  |         |
| Cardiovascular disease         | 17 (36.2)    | 10(33.3)            | 7(41.2)          | 0.591   |
| Chronic kidney disease         | 16 (34.0)    | 10(33.3)            | 6(35.3)          | 0.892   |
| Diabetes                       | 21 (44.7)    | 12(40.0)            | 9(52.9)          | 0.391   |
| Hypertension                   | 34 (72.3)    | 20(66.7)            | 14(82.4)         | 0.415   |
| Malignancy                     | 8 (17.0)     | 3(10.0)             | 5(29.4)          | 0.194   |
| Abnormal liver function tests‡ |              |                     |                  |         |
| ALT                            | 12(52.2)     | 3(30.0)             | 9(69.2)          | 0.100   |
| AST                            | 22(95.7)     | 9(90.0)             | 13(100.0)        | 0.435   |
| AKP                            | 12(52.2)     | 5(50.0)             | 7(53.8)          | 1.000   |
| TP                             | 11(47.8)     | 4(40.0)             | 7(53.8)          | 0.680   |
| Albumin                        | 15(65.2)     | 5(50.0)             | 10(76.9)         | 0.221   |
| TB                             | 4(17.4)      | 0(0.0)              | 4(30.8)          | 0.104   |
| DB                             | 5(21.7)      | 1(10.0)             | 4(30.8)          | 0.613   |
| Liver injury§                  | 23 (65.7)    | 10 (52.6)           | 13 (81.3)        | 0.152   |



Abbreviations: CLD, chronic liver disease; SD, standard deviation; ALT, alanine aminotransferase; AST, aspartate aminotransferase; ALP, alkaline phosphatase; TP, total protein; TB, total bilirubin; DB, direct bilirubin.

†: Patients were classified into critical and non-critical groups. Patients were defined as critical if they had any of the following outcomes: death, use of mechanical ventilation, or admission to the ICU. If they did not, they were defined as non-critical.

‡: The number and percentage for all the lab values are for patients with abnormal lab values (i.e., above the normal upper limit).

§: Liver injury was defined as any parameter above the normal upper limit (including ALT, 6-45 U/L; AST, 10- 42 U/L; ALP, 34-104 U/L; TP, 6.0-8.0 G/DL; albumin, 3.5-5.0 G/DL; TB, 0.2-1.3 MG/DL; DB, 0-0.3 MG/DL), based on the worst liver function test result recorded during hospitalization.

Supplementary Table S3. Clinical characteristics of COVID-19 patients with or without CLD

| Clinical and laboratory        | Total (n=1439) | No<br>CLD(n=1392) | With CLD(n=47) | P value |
|--------------------------------|----------------|-------------------|----------------|---------|
| Age, mean±SD, years            | 55.2±19.9      | 55.1±20.0         | 59.4±14.3      | < 0.001 |
| Sex                            |                |                   |                |         |
| Male                           | 723 (50.2)     | 692 (49.7)        | 31 (66.0)      | 0.028   |
| Female                         | 716 (49.8)     | 700 (50.3)        | 16 (34.0)      |         |
| Comorbidities                  |                |                   |                |         |
| Cardiovascular disease         | 368 (25.6)     | 351 (25.2)        | 17 (36.2)      | 0.090   |
| Chronic kidney disease         | 198 (13.8)     | 182 (13.1)        | 16 (34.0)      | < 0.001 |
| Diabetes                       | 463 (32.2)     | 442 (31.8)        | 21 (44.7)      | 0.062   |
| Hypertension                   | 754 (52.4)     | 720 (51.7)        | 34 (72.3)      | 0.020   |
| Malignancy                     | 131 (9.1)      | 123 (8.84)        | 8 (17.0)       | 0.055   |
| Abnormal liver function tests† |                |                   |                |         |
| ALT                            | 289 (64.8)     | 272 (65.8)        | 17 (52.2)      | 0.188   |
| AST                            | 420 (94.1)     | 390 (94.0)        | 30 (95.7)      | 0.748   |
| AKP                            | 205 (46.0)     | 189 (45.5)        | 17 (52.2)      | 0.537   |
| TP                             | 247 (55.8)     | 232 (56.4)        | 15 (47.8)      | 0.426   |
| Albumin                        | 357 (80.9)     | 336 (82.2)        | 21 (65.2)      | 0.046   |
| TB                             | 57 (12.7)      | 51 (12.3)         | 6 (17.4)       | 0.483   |
| DB                             | 105 (29.0)     | 98 (29.3)         | 7 (25.0)       | 0.681   |

|                                                    |            |            |           |       |
|----------------------------------------------------|------------|------------|-----------|-------|
| Liver injury‡                                      | 446 (50.5) | 415 (49.7) | 31 (65.7) | 0.065 |
| Time to development of liver injury, mean±SD, days | 3.3±4.4    | 3.3±4.4    | 3.2±3.9   | 0.968 |

---

Abbreviations: SD, standard deviation; CLD, chronic liver disease; SD, standard mean; ALT, alanine aminotransferase; AST, aspartate aminotransferase; ALP, alkaline phosphatase; TP, total protein; TB, total bilirubin; DB, direct bilirubin.

†: The number and percentage for all the lab values are for patients with abnormal lab values (i.e., above the normal upper limit).

‡: Liver injury was defined as any parameter above the normal upper limit (including ALT, 6-45 U/L; AST, 10- 42 U/L; ALP, 34-104 U/L; TP, 6.0-8.0 G/DL; albumin, 3.5-5.0 G/DL; TB, 0.2-1.3 MG/DL; DB, 0-0.3 MG/DL), based on the worst liver function test result recorded during hospitalization.

Supplementary Table S4. Postmortem liver findings in eight COVID-19 patients

| Patients | Age, y | Gender | History of Chronic Liver Disease | History of Smoking, Alcohol consumption | Comorbid conditions                                                                                                                           | AKP (U/L)     | Albumin (g/dL) | AST/ALT (U/L) | Liver Pathology Findings                                                                                           |
|----------|--------|--------|----------------------------------|-----------------------------------------|-----------------------------------------------------------------------------------------------------------------------------------------------|---------------|----------------|---------------|--------------------------------------------------------------------------------------------------------------------|
| 1        | 73     | Female | Not available                    | Active smoker, Alcohol consumption      | Not known                                                                                                                                     | Not available | Not available  | Not available | No specific pathologic findings                                                                                    |
| 2        | 63     | Female | No                               | Former smoker                           | Advanced stage of ALL/Lymphoma, chemo                                                                                                         | 84            | 3.2            | 14/15         | Portal triads with minimal lymphocytic infiltrate , focal infiltrate                                               |
| 3        | 61     | Female | No                               | no                                      | Asthma, CVA, carotid artery dissection, hyperlipidemia hypothyroidism                                                                         | 193           | 2.3            | 54 /26        | Portal triads with minimal lymphocytic infiltrate, rare fibrin thrombi in portal veins                             |
| 4        | 74     | Male   | No                               | Former smoker                           | diabetes, hypertension, CAD, MRSA bacteremia, PV endocarditis                                                                                 | 73            | 2.3            | 14/08         | Portal triads with minimal lymphocytic infiltrate                                                                  |
| 5        | 77     | Male   | No                               | no                                      | DVT/PE, hypertension, gout, cardiac amyloid                                                                                                   | 169           | 2.2            | 64 /38        | Portal triads with mild lymphocytic infiltrate, central vein outflow obstruction                                   |
| 6        | 80     | Female | No                               | Alcohol consumption, active smoking     | COPD, CAD, Sjogren's syndrome                                                                                                                 | 35            | 2.5            | 29/18         | Portal triads with mild lymphocytic infiltrate, central vein outflow obstruction                                   |
| 7        | 85     | Male   | No                               | No                                      | Cerebrovascular accident with residual aphasia, obstructive sleep apnea, aortic regurgitation, acute endocarditis, hypertension, CKD          | 34            | 2.5            | 83/53         | Mild portal tiads with mild lymphocytic infiltrate, central vein outflow obstruction with central lobular necrosis |
| 8        | 50     | Male   | No                               | Former smoker; Alcohol consumption      | Myeloproliferative neoplasm (JAK2 mutation) complicated by DVT/PE, large gastric and esophageal varices s/p splenectomy and splenorenal shunt | 196           | 2.6            | 25 /20        | Portal triads with mild lymphocytic infiltrate , rare fibrin thrombi                                               |
